# Supplementary material for: Human Skeletal Muscle Possesses an Epigenetic Memory of Hypertrophy
Source: PubMed Central journal article supplement (PMC5789890; doi:10.1038/s41598-018-20287-3), 2018-01-30
Supplement: 41598_2018_20287_MOESM1_ESM.pdf [file 41598_2018_20287_MOESM1_ESM.pdf]

A

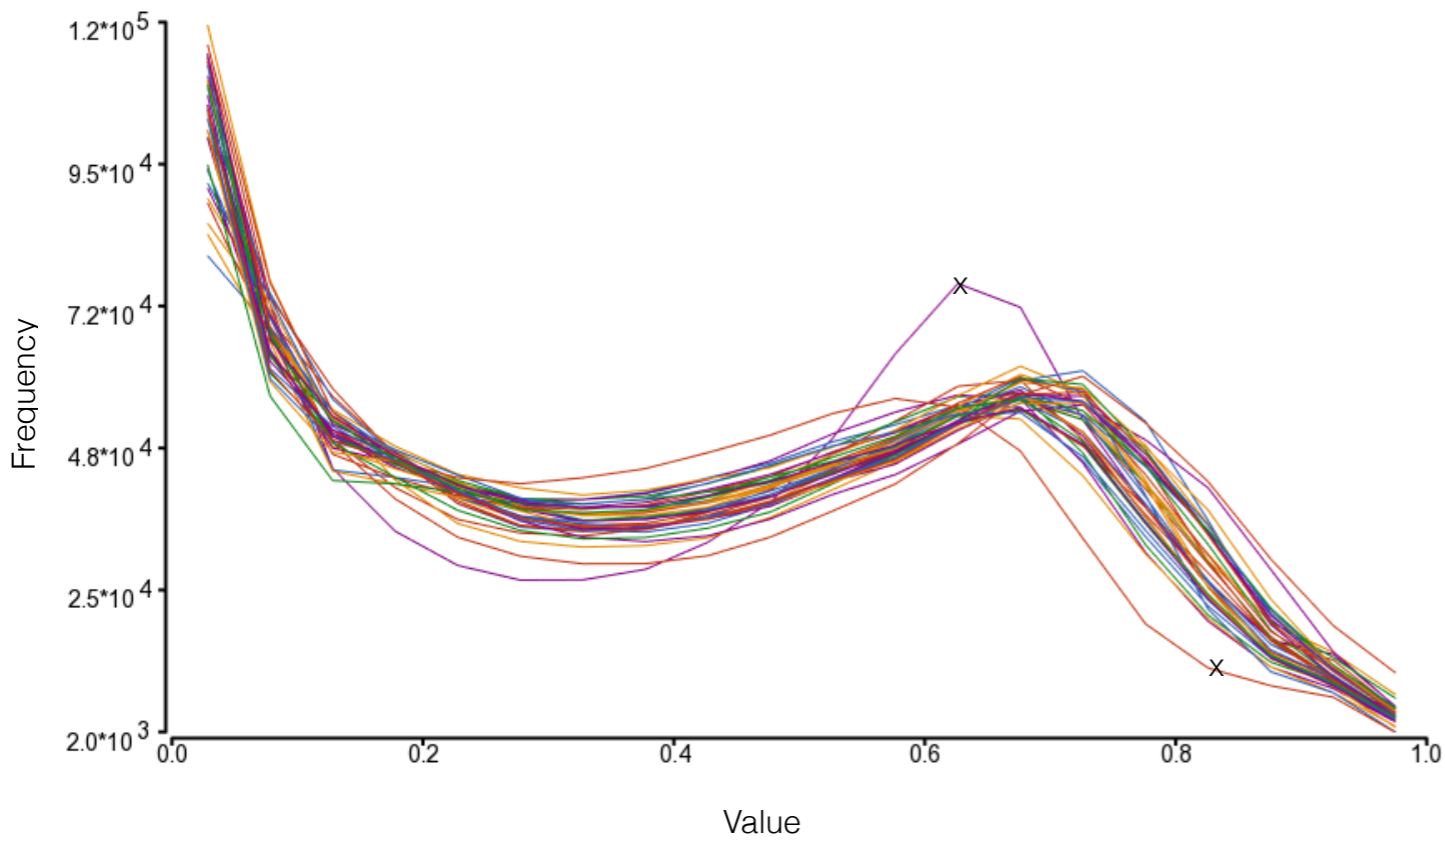

B

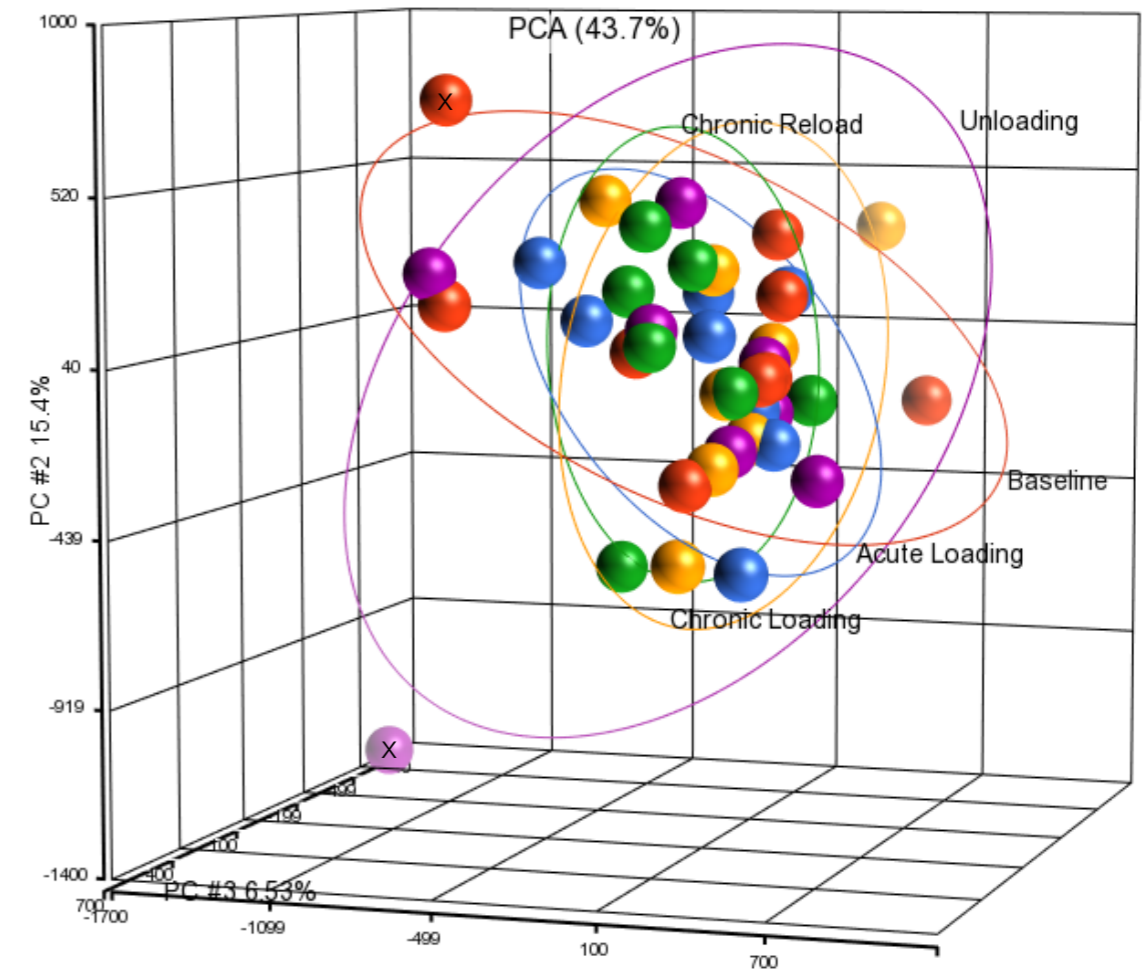

**Supplementary Figure 1.** Initial quality control analysis of human samples utilised for down-stream methylome wide bead arrays. **1a.** Histogram plot representing the distribution of intensity for each probe allowing for detection of aberrant samples. **1b.** Figure displaying the average methylation profile across all detected CpG loci allowing for analysis of variability using three-dimensional principal component analysis (PCA), where each sample is represented by a dot and ellipses for each condition. Two samples are identified as being outliers (X) from both quality control procedures and were subsequently removed from down-stream analysis.

**Title: Human Skeletal Muscle Possesses an Epigenetic Memory of Hypertrophy**

**Authors: Robert A. Seaborne, Juliette Strauss, Matthew Cocks, Sam Shepherd, Thomas D. O'Brien, Ken A. van Someren, Phillip G. Bell, Christopher Murgatroyd, James, P. Morton, Claire E. Stewart, Adam P. Sharples**

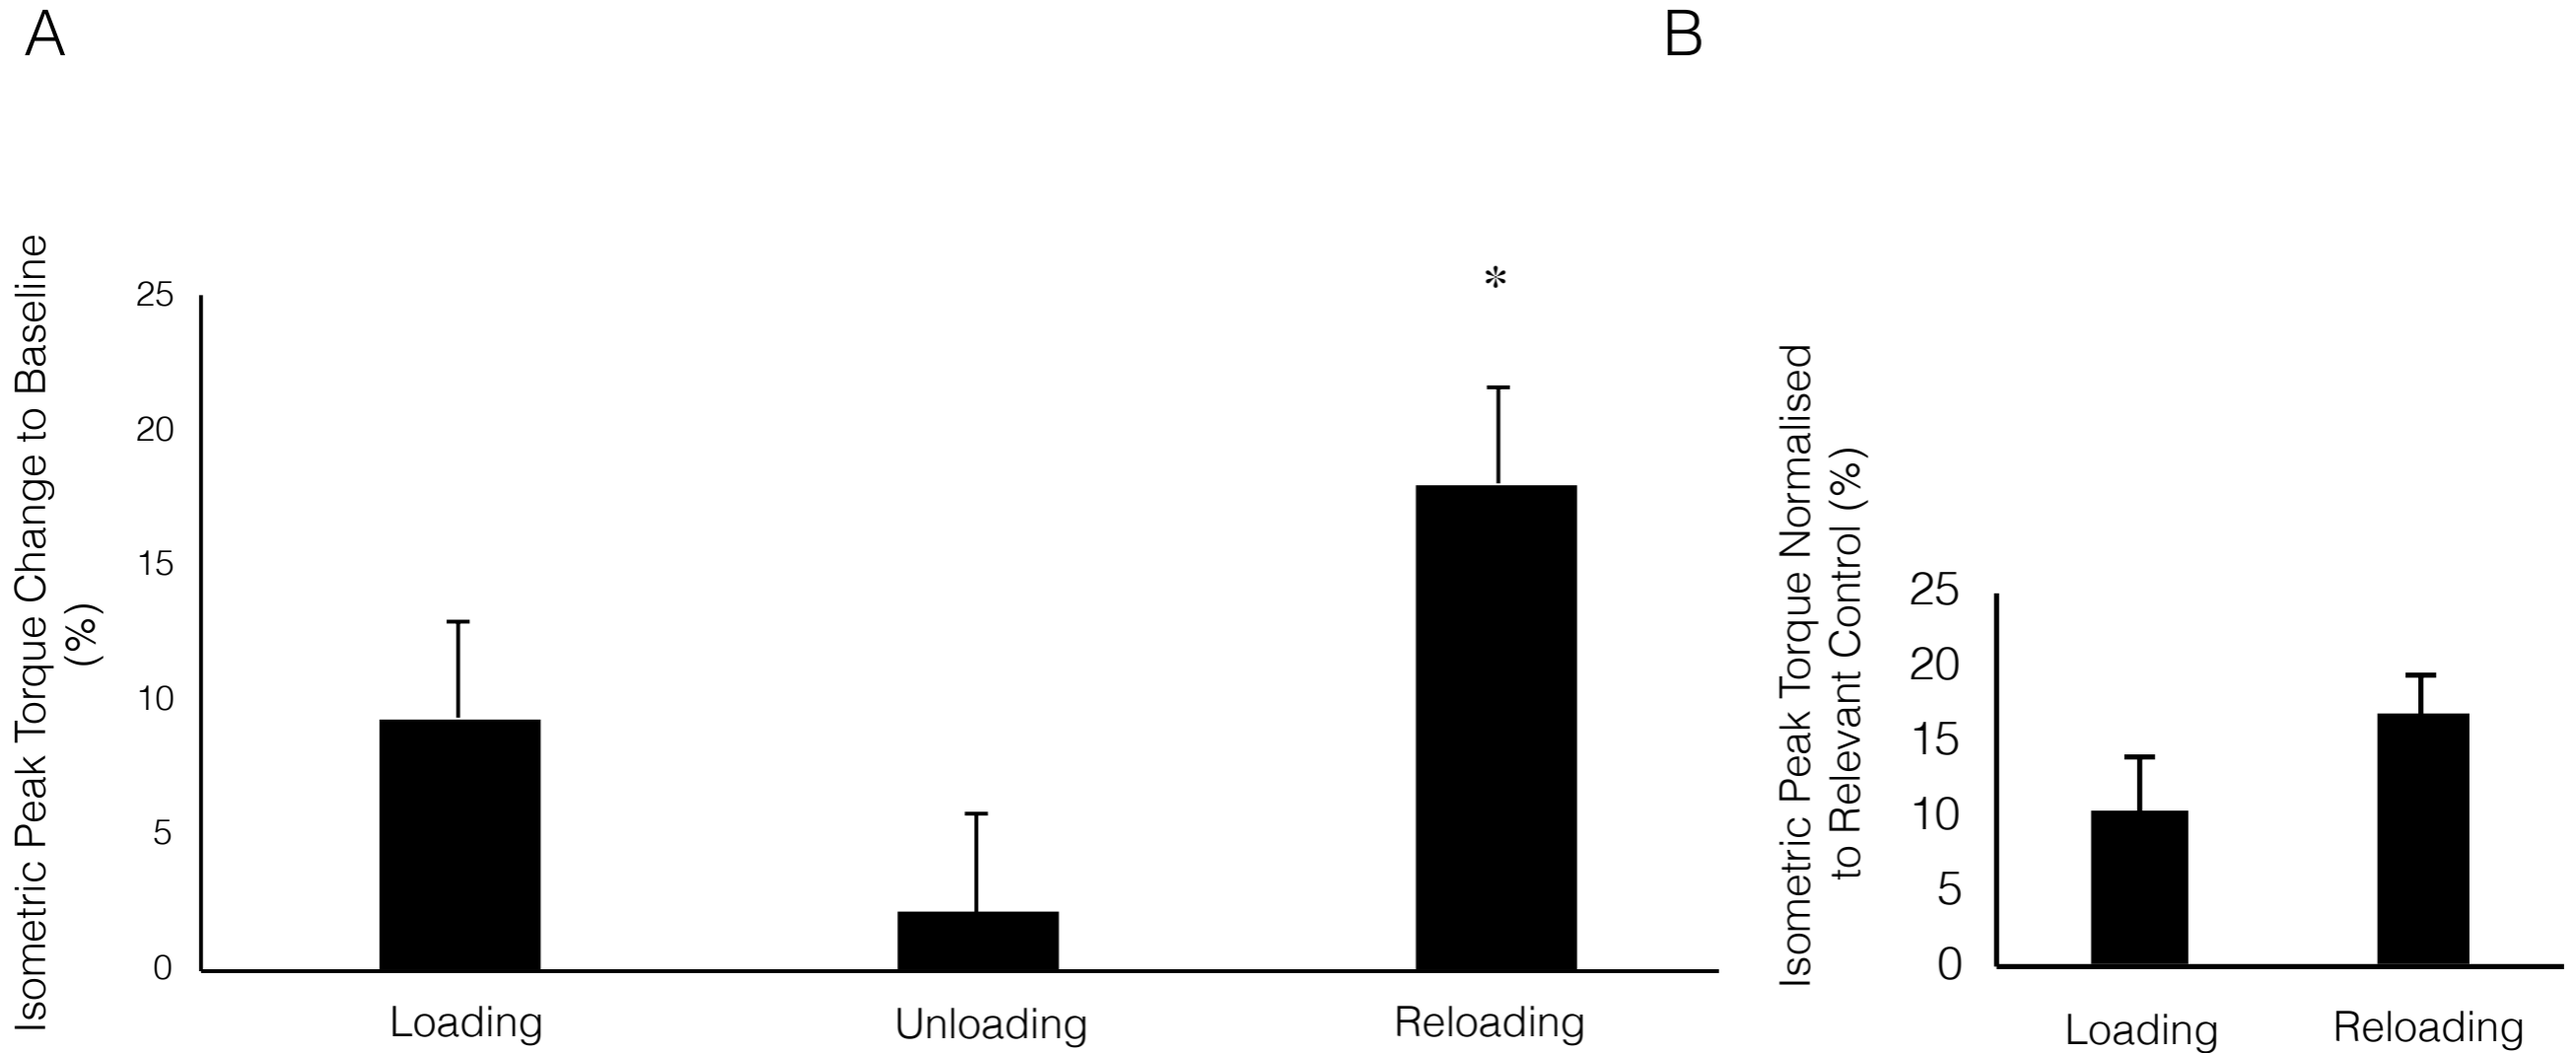

**Supplementary Figure 2.** Isometric quadriceps peak torque in human participants (n=7) after a period of 7 weeks' resistance exercise (loading), exercise cessation (unloading) and a subsequent second period of 7 weeks' resistance exercise (reloading) (Sup Fig 1a.). Significant change compared to baseline represented by \*. **1b.** Isometric peak torque change when loading is normalised to baseline, and reloading normalised to unloading to account for any residual strength from the loading period. Pairwise t-test of significance indicated by \*. All data presented as mean  $\pm$  SEM (n=7).

**Title: Human Skeletal Muscle Possesses an Epigenetic Memory of Hypertrophy**

**Authors: Robert A. Seaborne, Juliette Strauss, Matthew Cocks, Sam Shepherd, Thomas D. O'Brien, Ken A. van Someren, Phillip G. Bell, Christopher Murgatroyd, James, P. Morton, Claire E. Stewart, Adam P. Sharples**

A

## Loading Condition - PI3K/AKT Signalling Pathway

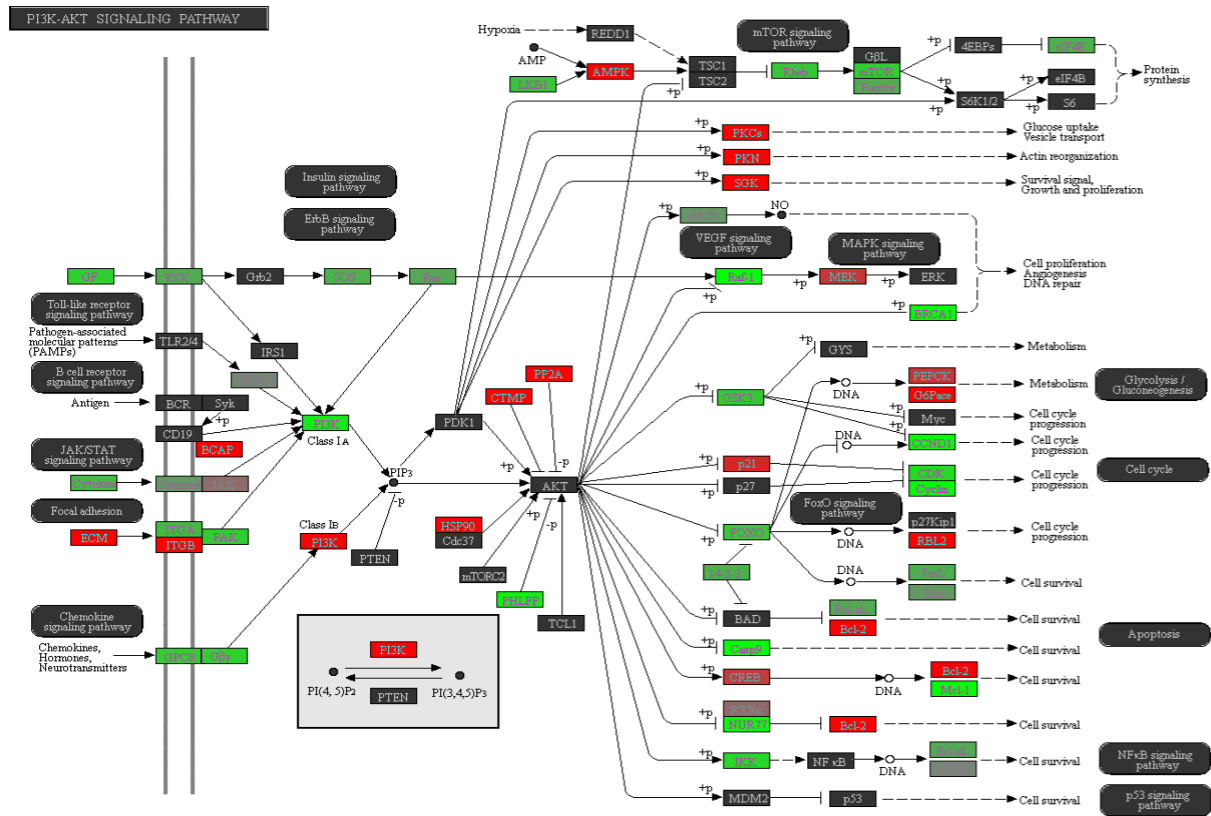

B

## Unloading Condition - PI3K/AKT Signalling Pathway

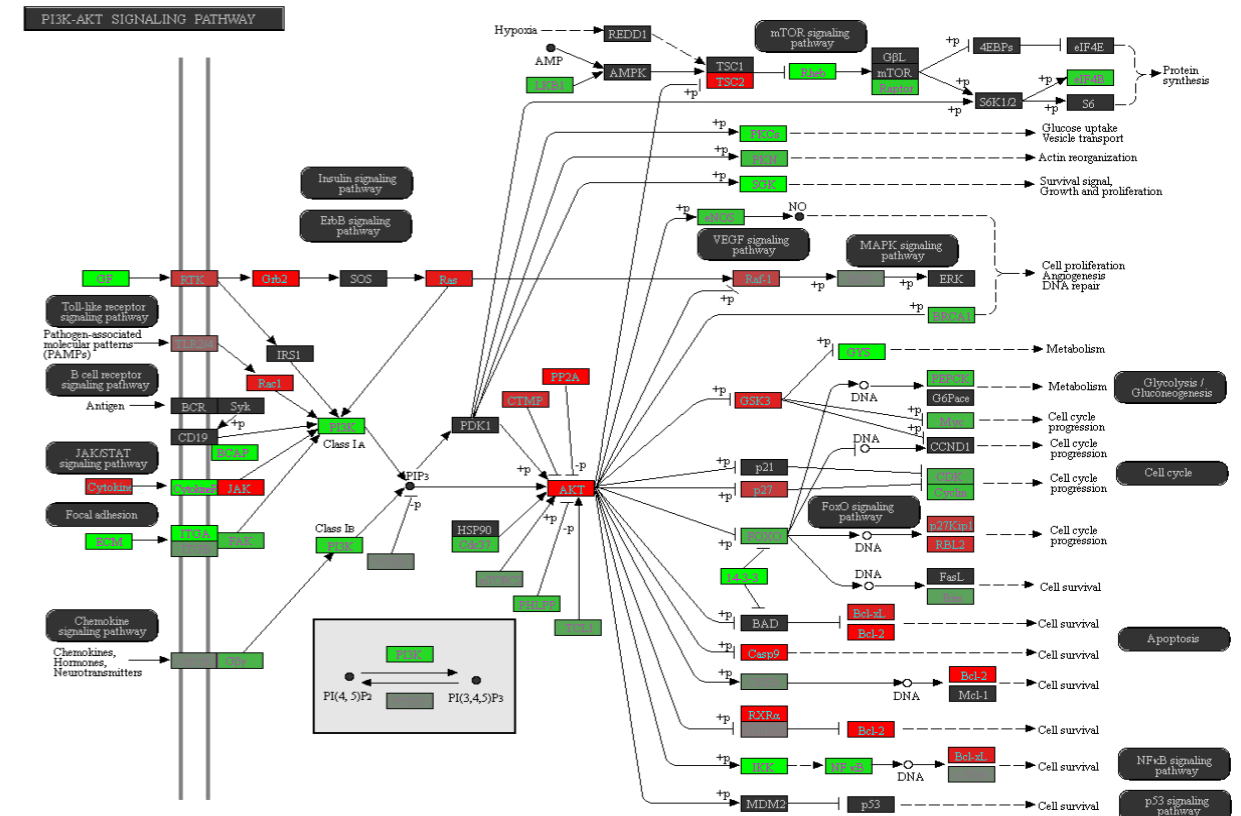

**Supplementary Figure 3.** Representation of the DNA methylation modifications that occurred within the PI3K/AKT signalling pathway following 7 weeks of loading (Supp. figure 3a) and unloading (Supp. figure 3b) in human subjects. Signalling analysis performed on statistically differentially regulated CpG sites compared to baseline, with green indicating a hypomethylated fold change and red indicating a hypermethylated change, with strength of colour representing the intensity of fold change<sup>23-25</sup>.

**Title:** Human Skeletal Muscle Possesses an Epigenetic Memory of Hypertrophy

**Authors:** Robert A. Seaborne, Juliette Strauss, Matthew Cocks, Sam Shepherd, Thomas D. O'Brien, Ken A. van Someren, Phillip G. Bell, Christopher Murgatroyd, James, P.

**Morton, Claire E. Stewart, Adam P. Sharples**

A

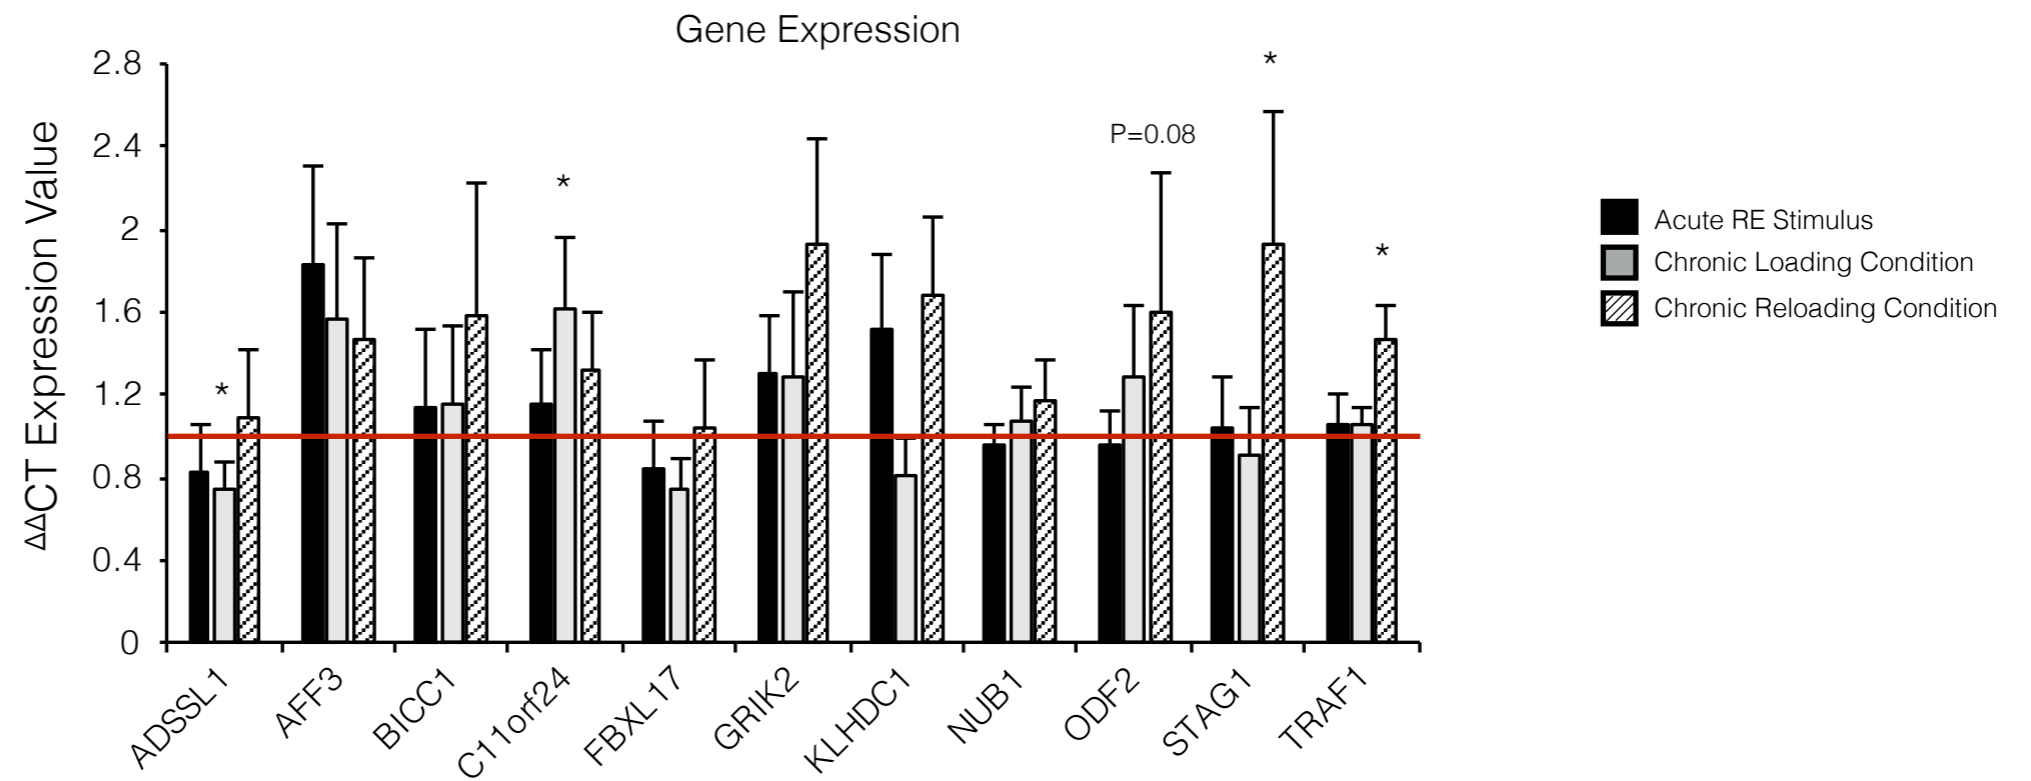

B

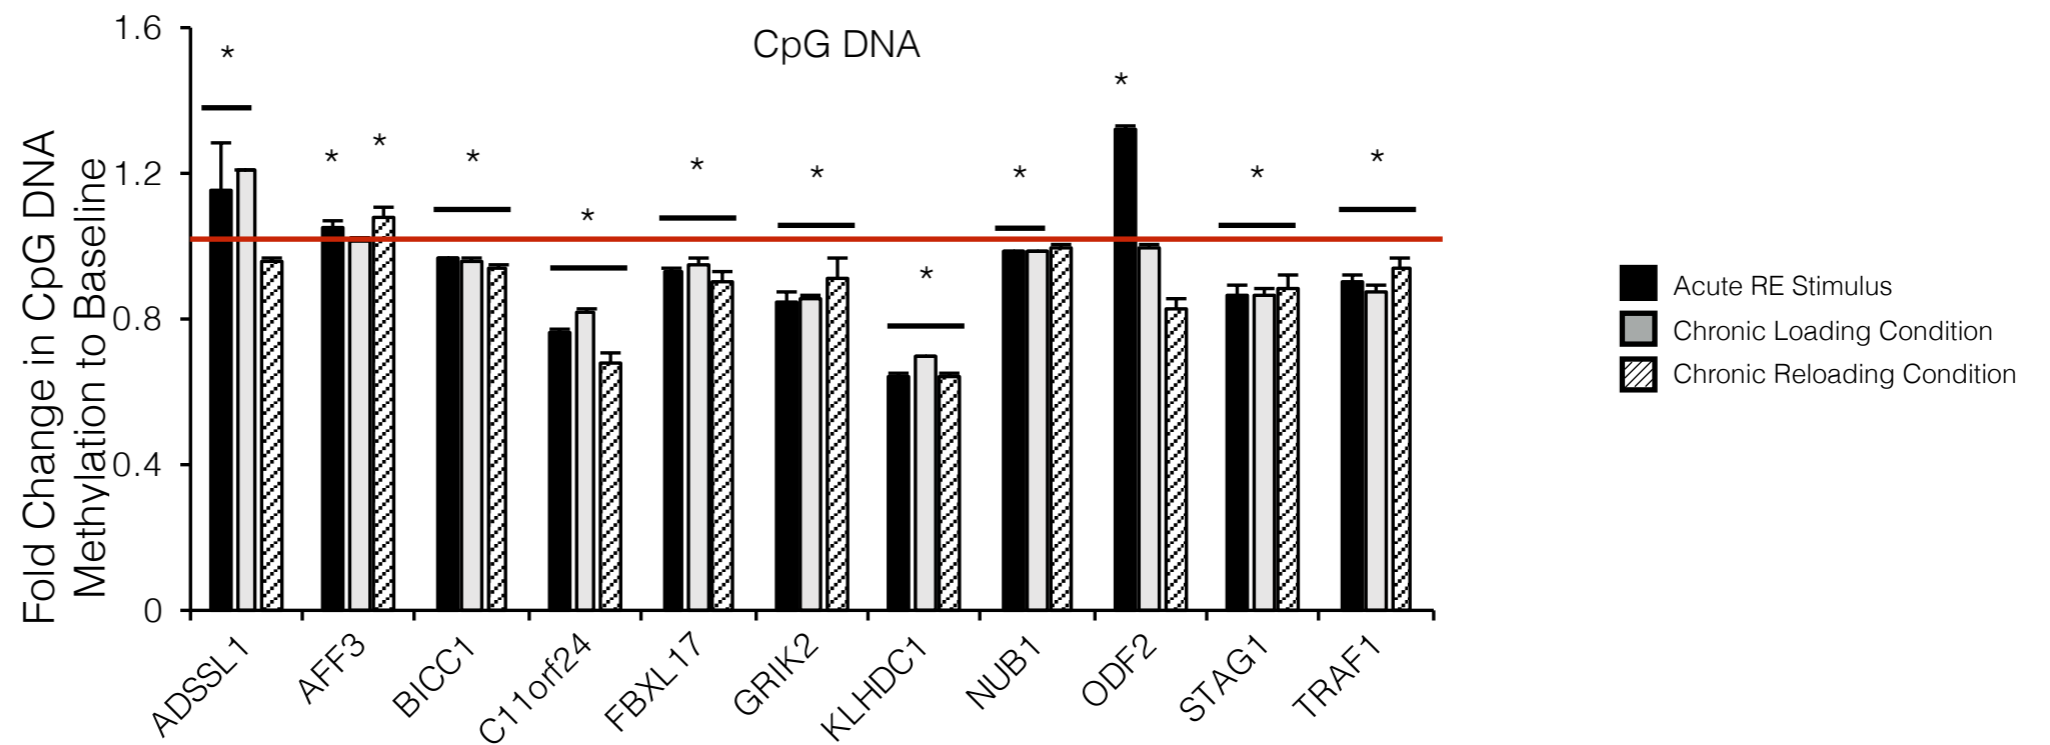

**Supplementary Figure 4.** Relative fold changes in; **a**, gene expression, and, **b**, CpG DNA methylation in all 18 gene transcripts identified from comparison of methylome data from acute RE vs. 7 weeks loading, unloading, reloading analysis. Data represented as means  $\pm$  SEM, with significance compared to baseline (red line) indicated by \*.

**Title: Human Skeletal Muscle Possesses an Epigenetic Memory of Hypertrophy**

**Authors: Robert A. Seaborne, Juliette Strauss, Matthew Cocks, Sam Shepherd, Thomas D. O'Brien, Ken A. van Someren, Phillip G. Bell, Christopher Murgatroyd, James, P.**

**Morton, Claire E. Stewart, Adam P. Sharples**
